# Supplementary material for: The family of tetranuclear Nb4OI12−x clusters (x = 0, 1, 2): from the molecular Nb4OI12 cluster to extended chains and layers
Source: Royal Society of Chemistry journal article supplement (doi:10.1039/d5dt00174a), 2025-01-01
Supplement: d5dt00174a1.pdf [file d5dt00174a1.pdf]

## Supporting Information

### The Family of tetranuclear $\text{Nb}_4\text{OI}_{12-x}$ Clusters ( $x = 1, 2$ ): From the molecular $\text{Nb}_4\text{OI}_{12}$ cluster to extended chains and layers

Jan Beitzberger,<sup>a</sup> Mario Martin,<sup>b</sup> Marcus Scheele,<sup>b</sup> Patrick Schmidt,<sup>a</sup> Markus Ströbele,<sup>a</sup> and H.-Jürgen Meyer<sup>\*a</sup>

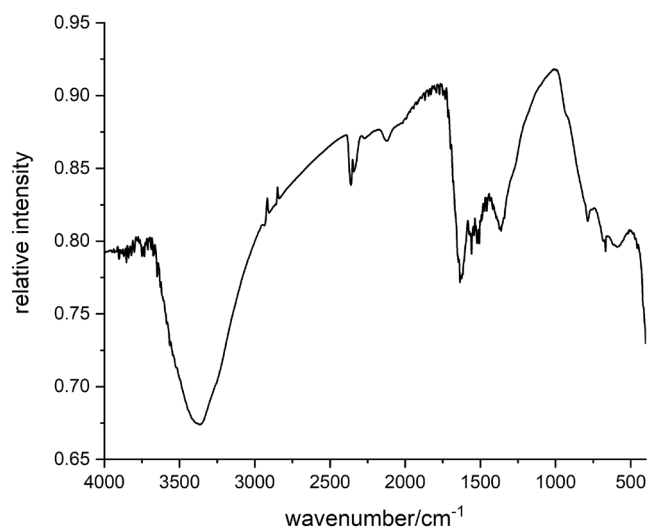

**Figure S1.** IR spectrum of the residual powder after the reduction of carbodiimide.

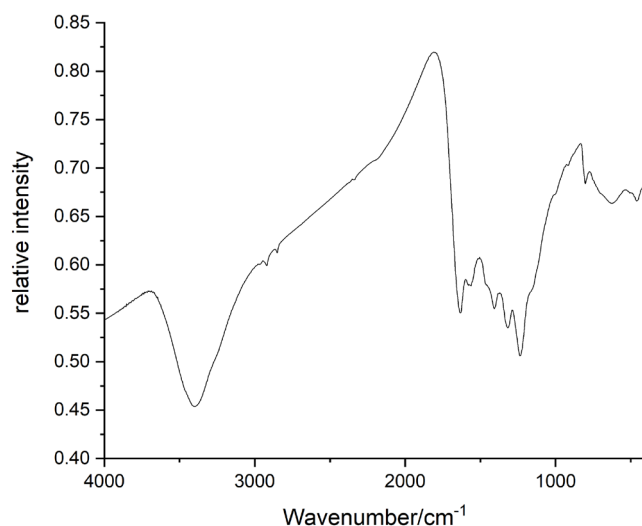

**Figure S2.** IR spectrum of the reaction product of amorphous  $\text{C}_3\text{N}_4$ , made by a literature method.<sup>[1]</sup>

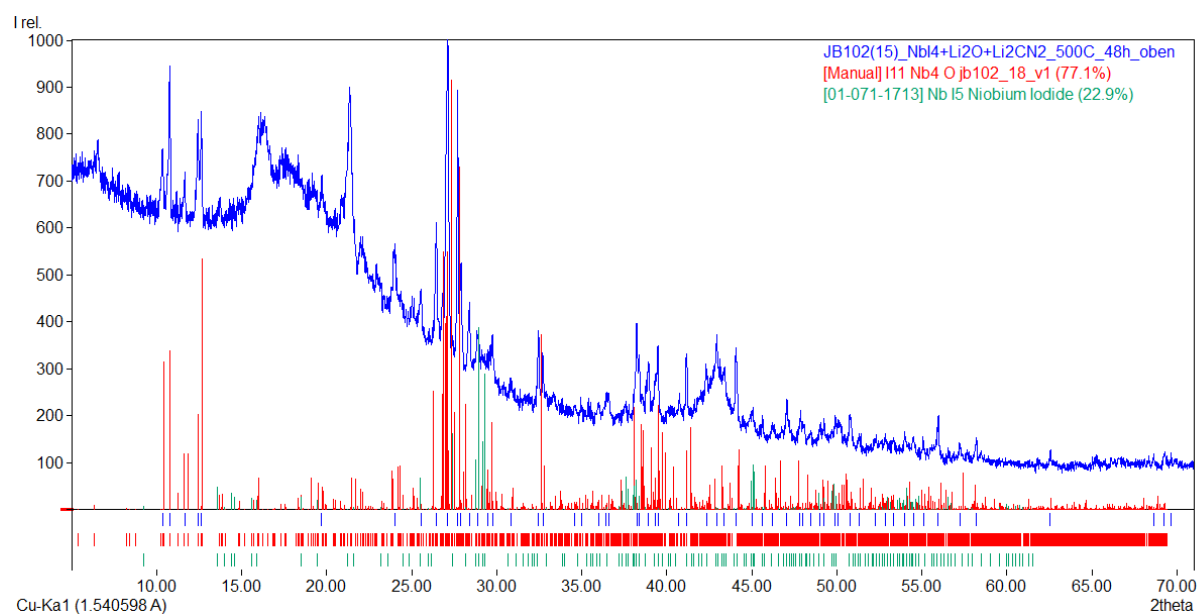

**Figure S3.** Measured powder X-ray diffraction pattern of  $b\text{-Nb}_4\text{OI}_{11}$  with  $\text{Cu-K}\alpha_1$ -radiation. In blue is the measured powder pattern, red corresponds to the calculated reflections of the single crystal X-ray measurement of  $b\text{-Nb}_4\text{OI}_{11}$  and in green are the Bragg positions of coproduced  $\text{NbI}_5$ .

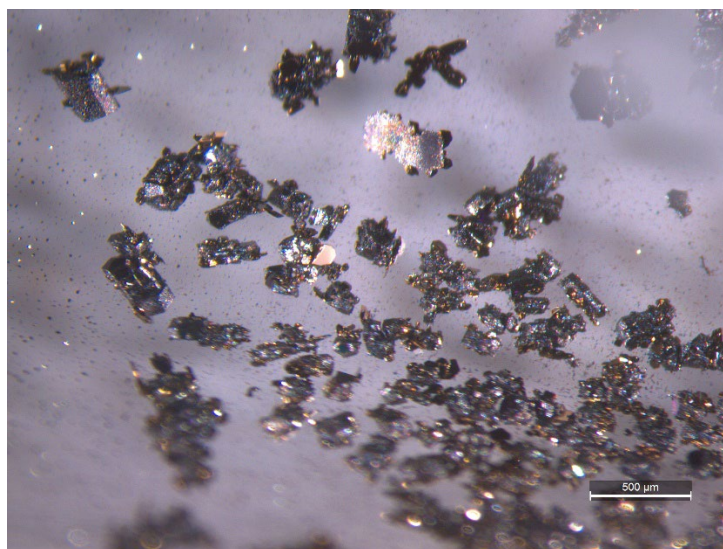

**Figure S4.** Example of black  $b\text{-Nb}_4\text{OI}_{11}$  crystals along with some  $\text{NbI}_5$  (golden plates).

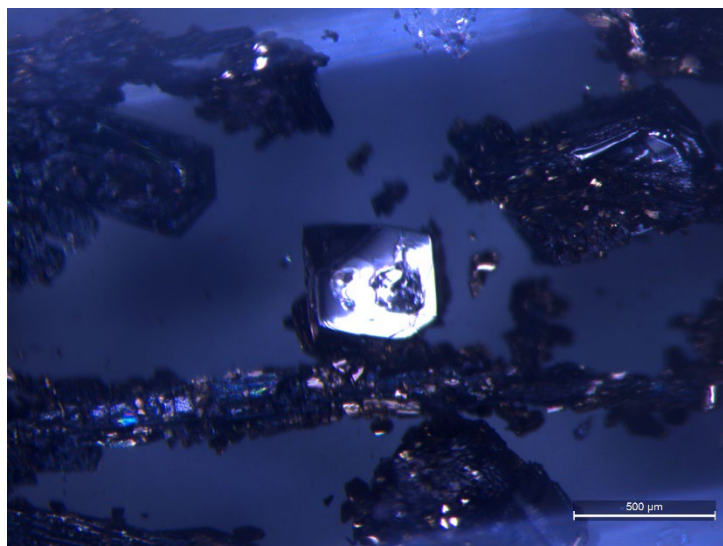

**Figure S5.** Example of a black Nb<sub>4</sub>OI<sub>12</sub> crystal along with some b-Nb<sub>4</sub>OI<sub>11</sub> aside.

- [1] H. Zhao, X. Chen, C. Jia, T. Zhou, X. Qu, J. Jian, Y. Xu, T. Zhou, *Materials Science and Engineering: B* **2005**, *122*, 90-93.
